# Supplementary material for: Several RNase T2 enzymes function in induced tRNA and rRNA turnover in the ciliate Tetrahymena
Source: PubMed Central journal article supplement — Mol Biol Cell. 2012 Jan 1;23(1):36–44. doi: 10.1091/mbc.E11-08-0689 (PMC3248902; doi:10.1091/mbc.e11-08-0689), 2012-01-01
Supplement: supp_E11-08-0689_CombinedSupMats.pdf [file supp_E11-08-0689_CombinedSupMats.pdf]

**Supplemental Table S1:** List of oligonucleotides

*Oligonucleotides for PCR/cloning:*

(non-genomic sequences (restriction sites/linkers) are given in capital letters)

>kla59 T2A Up forw KpnI  
CAGGGTACCtcatgtcccactcacataact  
>kla60 T2A Up Rev BamHI  
CAGGGATCCattccaataacccccactc  
>kla61 T2A Down forw BamHI  
CAGGGATCCcaattcaatcaaacctcccttc  
>kla62 T2A Down Rev SacI  
CAGGAGCTCtccaataatagaattatcccctgt  
>kla63 T2B Up Forw KpnI  
CAGGGTACCtctgtttgtttgtttgtgg  
>kla64 T2B Up Rev BamHI  
CAGGGATCCaaagatatttaaaagggggactc  
>kla65 T2B Down forw BamHI  
CAGGGATCCttggccactttcaataaaaca  
>kla66 T2B Down Rev SacI  
CAGGAGCTCaaaccacaaaactcaaccatt  
>kla67 T2C Up Forw KpnI  
CAGGGTACCgaaaagtactgcttgcttaagctct  
>kla68 T2C Up Rev BamHI  
CAGGGATCCtgaaaaagtatccccttctcaat  
>kla69 T2C Down forw BamHI  
CAGGGATCCaagatgacgaacaaatgagga  
>kla70 T2C Down Rev SacI  
CAGGAGCTCtcagctttaaatattcatcgataa  
>kla71 T2DEF Up Forw KpnI  
CAGGGTACCaattacgctccattaaatctgctc  
>kla72 T2DEF Up Rev BamHI  
CAGGGATCCtaattattgattagaaatgttgctg  
>kla73 T2DEF Down forw BamHI  
CAGGGATCCcacatagattactgcccacat  
>kla74 T2DEF Down Rev SacI  
CAGGAGCTCaaaggataccaaaattcaaacc  
>kla87 T2G Up forw KpnI  
CAGGGTACCgtggaggggtatttcaact  
>kla88 T2G Up Rev BamHI  
CAGGGATCCccccataatttcaaaaagaa  
>kla89 T2G Down forw BamHI  
CAGGGATCCccttcttagcttttgatgaatcc  
>kla90 T2G Down Rev SacI  
CAGGAGCTCtatacctcaatttcataccaacaa  
>kla91 T2H Up Forw KpnI  
CAGGGTACCttttaccaatttatagtttggttt  
>kla92 T2H Up Rev BamHI  
CAGGGATCCtttaaaagggggcttttatg  
>kla93 T2H Down forw BamHI  
CAGGGATCCgcggtattgttcttatgatt  
>kla94 T2H Down Rev SacI  
CAGGAGCTCcttgcgggttcagtcaaaa

*Oligoes for detection of RNAs by Northern blot hybridization*

>tRNA Gly 5' \_MC

TACCACTAAACCATCGGTGC

>tRNA Gly 3' \_MC

TGCACCGACCGGGAATCGAAG

>tRNA Ala 5' \_MC

CTACCATTTGAGCTAGATCCCC

>tRNA Ala 3' \_MC

TGGAGAACCTGGGCATTGAT

>5SrDNA1 \_MC (3'end)

GGTTGTCGACACTGGGACTTC

>5.8S rDNA \_MC

CTGATGACTCGCGGTTCTGCAATT

>kla107 aSRP 1-3

TGGAGCGGGCACACTCTTAGCAAAGTGT

>kla104 U6 1-4

TTCGCGCAGGGGCCATGCTAATCTT

> kla112 CD32

GGCTTAACCCTGGGTTTCAGTAGGGTTAACTAC
